1 Chromosome level draft genomes of the fall  
2 armyworm, *Spodoptera frugiperda* (Lepidoptera:  
3 Noctuidae), an alien invasive pest in China

4 Huan Liu<sup>1,10\*</sup>, Tianming Lan<sup>1,11\*</sup>, Dongming Fang<sup>1,11\*</sup>, Furong Gui<sup>2,9\*</sup>,  
5 Hongli Wang<sup>1,10</sup>, Wei Guo<sup>3</sup>, Xiaofang Chen<sup>4</sup>, Yue Chang<sup>5</sup>, Shuqi He<sup>2</sup>,  
6 Lihua Lyu<sup>6</sup>, Sunil Kumar Sahu<sup>1,10</sup>, Le Chen<sup>7</sup>, Haimeng Li<sup>1</sup>, Ping Liu<sup>4</sup>,  
7 Guangyi Fan<sup>5</sup>, Tongxian Liu<sup>8</sup>, Ruoshi Hao<sup>9</sup>, Haorong Lu<sup>1,10</sup>, Bin  
8 Chen<sup>9</sup>, Shusheng Zhu<sup>2</sup>, Zhihui Lu<sup>9</sup>, Fangneng Huang<sup>12</sup>, Wei Dong<sup>1,10</sup>,  
9 Yang Dong<sup>2</sup>, Le Kang<sup>3</sup>, Huangming Yang<sup>1,10</sup>, Jun Sheng<sup>2,9#</sup>, Youyong  
10 Zhu<sup>2#</sup>, Xin Liu<sup>1,10#</sup>.

11 1. BGI-Shenzhen, Beishan Industrial Zone, Yantian District, Shenzhen 518083,  
12 China

13 2. Yunnan Agricultural University, Kunming 650201, China

14 3. Institute of Zoology, Chinese Academy of Sciences, Beijing 100101, China

15 4. MGI, BGI-Shenzhen, Shenzhen 518083, China

16 5. BGI-Qingdao, BGI-Shenzhen, Qingdao 266555, China

17 6. Plant protection research institute , Guangdong Academy of Agricultural  
18 Sciences, Guangzhou 510640, China

19 7. BGI-Yunnan, No. 389 Haiyuan Road, High-tech Development Zone, Kunming,  
20 Yunnan 650106, China

21 8. Plant Medical College, Qingdao Agricultural University. Qingdao 266109,  
22 China

23 9. Yunnan Plateau Characteristic Agriculture Industry Research Institute ,  
24 Kunming 650201, China

25 10. State Key Laboratory of Agricultural Genomics, BGI-Shenzhen, Shenzhen  
26 518083, China,

27 11. China National GeneBank, Jinsha Road, Dapeng New District, Shenzhen  
28 518120, China,

29 12. Department of Entomology, Louisiana State University AgCenter

30

31 \*These authors contributed equally to this work.

32 #Correspondence: Xin Liu( [liuxin@genomics.cn](mailto:liuxin@genomics.cn)), Youyong Zhu  
33 ( [yyzhu@ynau.edu.cn](mailto:yyzhu@ynau.edu.cn) ), or Jun Sheng( [shengjunpuer@163.com](mailto:shengjunpuer@163.com) )

34 **Abstract:**

35 The fall armyworm (FAW), *Spodoptera frugiperda* (J.E. Smith) is a severely  
36 destructive pest native to the Americas, but has now become an alien invasive  
37 pest in China, and causes significant economic loss. Therefore, in order to make  
38 effective management strategies, it is highly essential to understand genomic  
39 architecture and its genetic background. In this study, we assembled two  
40 chromosome scale genomes of the fall armyworm, representing one male and  
41 one female individual procured from Yunnan province of China. The genome  
42 sizes were identified as 542.42 Mb with N50 of 14.16 Mb, and 530.77 Mb with  
43 N50 of 14.89 Mb for the male and female FAW, respectively. We predicted about  
44 22,201 genes in the male genome. We found the expansion of cytochrome P450  
45 and glutathione s-transferase gene families, which are functionally related to the  
46 intensified detoxification and pesticides tolerance. Further population analyses of  
47 corn strain (C strain) and rice strain (R strain) revealed that the Chinese fall  
48 armyworm was most likely invaded from Africa. These strain information,  
49 genome features and possible invasion source described in this study will be  
50 extremely important for making effective strategies to manage the fall  
51 armyworms.

52 **Key Words:** Fall armyworm, *Spodoptera frugiperda*, Chromosome-level genome,  
53 Insect, Pest

54 **1 Introduction**

55 It has been more than 100 years since the Fall armyworm (FAW), *Spodoptera*  
56 *frugiperda* (J.E. Smith) was reported to damage maize and other crops in the  
57 USA<sup>1</sup>. It is a severely destructive agricultural pest native to Americas which  
58 survives the whole year in the tropical and subtropical area from far south  
59 Argentina, Chile and La Pampa to far north Florida, Texas, Mexico and the  
60 Caribbean<sup>2-5</sup>. It cannot survive severe winters because of the lack of diapause.  
61 However, FAW has a remarkable capacity of long-distance migration, with

62 which the FAW can fly over 100 km per night<sup>6</sup>. Each spring, it can migrate over  
63 2000 km from the overwintering areas to reinvade more northern regions, even  
64 up to Canada<sup>4,7,8</sup>. Recently, FAW spread out from its native region and invaded  
65 into Africa in 2016 with the report in São Tomé, Bénin, Togo and Nigeria<sup>9</sup>. This  
66 invasion rapidly became widespread in the whole sub-Saharan Africa till  
67 October 2017<sup>10,11</sup>. Following this trend, FAW soon invaded into many Asian  
68 countries, including India, Yemen, Thailand, Myanmar and Sri Lanka in 2018<sup>12-14</sup>.  
69 Early R *et al* (2018)<sup>5</sup> forecasted that China is one of the most vulnerable countries  
70 of being invaded by the FAW according to the information on frequent  
71 commercial trade and passenger transportation between Africa and China. Half a  
72 year later after this forecast, in January 2019, International Plant Protection  
73 Convention (IPPC) Contact Point for China spotted FAW for the first time in  
74 Puer and Dehong city, Yunnan Province, China  
75 (<https://www.ippc.int/en/news/first-detection-of-fall-armyworm-in-china/>). This  
76 invasive pest has rapidly invaded many provinces in China by June 2019. Now,  
77 the FAW has been detected in large parts of the world (Figure 1).

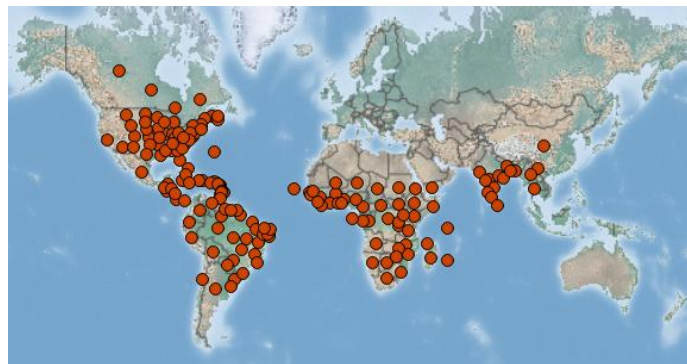

78

79 Figure 1 The distribution of the FAW all over the world<sup>15</sup>.

80 There are several hosts of FAW, which mainly includes 186 plant species from 42  
81 families<sup>16</sup>. Although FAW is a highly polyphagous pest, graminaceous plants are  
82 their preferred hosts, such as maize, rice, sorghum and other major agricultural  
83 species. Especially, maize is most likely to be attacked than other plant species<sup>9</sup>.  
84 Maize is very important food security of many countries in Asia, Africa, and  
85 Latin America (<https://maize.org/projects-cimmyt-and-iita-2/>), and now are  
86 facing severe threats from the infestation of the FAW. The production of maize  
87 infested by the FAW can suffer yield loss of 40% to 72%, and in some plots 100%  
88 total has been reported<sup>17-19</sup>. The yield loss of maize can reach 8.3 to 20.6m tons per  
89 year in just 12 African countries without any control methods for FAW,  
90 according to the study conducted by Centre for Agriculture and Biosciences  
91 International (CABI)<sup>20</sup>. For Brazil alone, cost to control the FAW on maize is more

92 than 600 million dollars per year<sup>21</sup>. The economic and the yield losses by FAW is  
93 a major concern worldwide.

94 The FAW is not a new species to science; it has been an herbivorous pest for  
95 many years. However, the mostly common used approach to mitigate the  
96 damage to crops is still the broad-spectrum insecticides<sup>22</sup>. The use of insecticides  
97 highly relies on the knowledge of farmers, but many farmers even do not know  
98 the name of the pest<sup>23</sup>. Lack of scientific guidance leads to the inappropriate use  
99 of pesticides. Besides, the effective management of FAW may require five sprays  
100 of pesticides per maize cycle<sup>21</sup>, and many smallholder farmers cannot afford the  
101 expensive costs for it, resulting in the use of low-quality products or low dose  
102 sprays<sup>24</sup>. Moreover, the FAW always hides inside the stem of maize, this makes  
103 the insecticide much less effective. Although many pesticides are less harmful to  
104 the environment and humans, all these factors can lead to the sublethal effects,  
105 which possibly help the FAW to evolve resistance against the pesticides<sup>25-27</sup>. An  
106 effective compensating management for insecticides is the use of *Bacillus*  
107 *thuringiensis* (Bt) toxins produced by the bacterium. Bt plants have been  
108 proved fatal to many insect pests, including the FAW<sup>28-30</sup>. The Bt toxin provides  
109 much longer protection than insecticides and less harmful to the environment  
110 and humans. Although some research reported the resistance of FAW to Bt  
111 maize<sup>29,30</sup>, multiple genes or new gene with more or new Bt toxin expressed are  
112 still thought to have a good performance for resisting the FAW<sup>29,30</sup>. Biological  
113 control, including the introduction of natural enemies and using companion  
114 cropping system<sup>19,21,25,31,32</sup>, is also an effective way to resist the FAW.

115 The FAW at least consist of two morphological identical but genetically distinct  
116 subpopulations, the corn strain (C strain) and rice strain (R strain)<sup>33-35</sup>. The two  
117 strains have their own preferable host plants. The C strain is preferentially  
118 associated with maize and other large grasses, but the C strain prefers rice and  
119 large grasses<sup>36,37</sup>. The C strain is subdivided into two subgroups, the FL-type and  
120 the TX-type<sup>38,39</sup>. The TX-type is distributed in most of the Americas, but the FL-  
121 type is only limited to Florida and the Caribbean<sup>3,35,40,41</sup>. Each strain has its strain  
122 specific physiological traits, leading to some strain-specific response to biological  
123 and chemical agents<sup>36,37,42</sup>. The C strain larvae are more tolerant than the R strain  
124 to the methyl parathion, cypermethrin, cypermethrin and  $\delta$ -endotoxin from  
125 transgenic Bt plant<sup>43</sup>. Therefore, the origin of FAW needs to be considered to  
126 make effective strategies to manage the FAW. The *Cytochrome c oxidase subunit I*  
127 (*COI*) and the *Triosephosphate isomerase (Tpi)* gene are also selected for identifying  
128 the subtype of the FAW, but these markers cannot always give the right  
129 identifications<sup>44</sup>.

130 The management of the FAW needs more detailed genetic information to help  
131 people know more about the FAW, to find more new genes to develop more  
132 effective Bt plants, and to more accurately identify the different strains for  
133 precision spraying of pesticides. Although several genomes of the FAW has been  
134 sequenced and assembled<sup>45-47</sup>, the assemblies were fragmented. Moreover, two  
135 genomes were assembled using the Sf21<sup>45</sup> and Sf9<sup>47</sup> cell line, respectively, the  
136 resource was unique that cannot well provide a comprehensive reference. In this  
137 study, we assembled two FAW genomes to the chromosome level using two  
138 samples (one male, one female) collected from Yunnan Province, China. We  
139 analyzed the subtype of the FAW invaded Yunnan province, and also discussed  
140 the possible resource of the invaded FAW in China. We are also screening  
141 expanded gene families to seek some key genes with the function of polyphagia  
142 and tolerance to insecticides. China is the second largest corn producer after the  
143 USA; therefore, it is urgent to select a series of methods to control the FAW. This  
144 study provided key information to help make strategies to manage the FAW in  
145 China.

## 146 2 Materials and Methods

### 147 2.1 Samples and treatments

148 We collected seven FAW samples, including four adults, two fifth-instar larvae  
149 and two sixth-instar larvae (Table 1). The four adult FAWs were collected from  
150 Yunnan Province, China, and the larvae were collected from Guangdong  
151 Province, China. One male and one female adult individual were used for  
152 genome sequencing and assembly (Figure 2). Two other adult FAWs were used  
153 to capture the conformation of chromosomes to perform the chromosome level  
154 genome assembly. One fifth-instar larva and one sixth-instar larva were  
155 subjected for the transcriptomic studies. One sixth-instar larva was used for  
156 whole genome sequencing with 5K and 300bp insert size. All samples were  
157 intestinal and ovarian, and thoroughly cleaned before performing DNA or RNA  
158 isolation.

159 Table 1 Samples used in this study

| Sample Identifier | Species                      | Location             | Sex     | Instars      |
|-------------------|------------------------------|----------------------|---------|--------------|
| SFynMstLFR        | <i>Spodoptera frugiperda</i> | Kunming, Yunnan      | Male    | Adult        |
| SFynFMstLFR       | <i>Spodoptera frugiperda</i> | Kunming, Yunnan      | Female  | Adult        |
| SFgdRNA 1         | <i>Spodoptera frugiperda</i> | Guangzhou, Guangdong | Unknown | Fifth-instar |
| SFgdRNA 2         | <i>Spodoptera frugiperda</i> | Guangzhou, Guangdong | Unknown | Sixth-instar |
| SFgdWGS           | <i>Spodoptera frugiperda</i> | Guangzhou, Guangdong | Unknown | Sixth-instar |
| SFynHiC           | <i>Spodoptera frugiperda</i> | Kunming, Yunnan      | Unknown | Adult        |



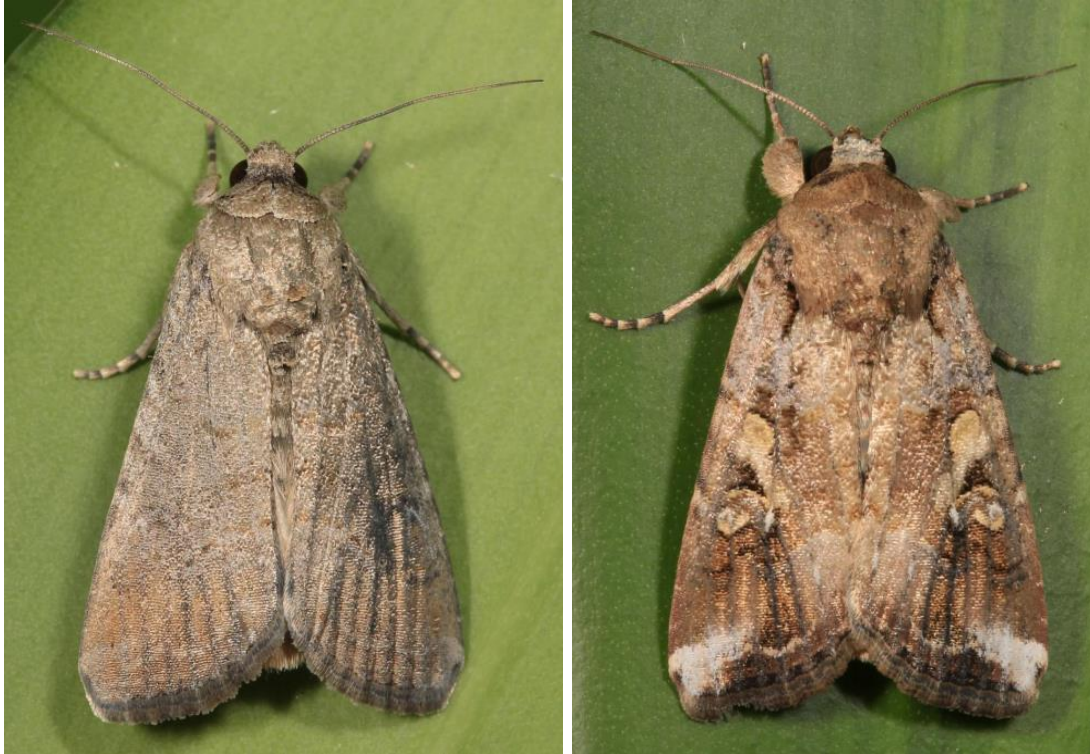

161

162 Figure 2 The two adult fall armyworm (FAWs) used for genome assembly. The left FAW is  
163 female, the right FAW is the male individual.

## 164 2.2 DNA isolation, library preparation, sequencing and genome assembly.

165 The high molecular weight DNA was extracted using the separated muscle tissue  
166 by following the protocol recommended by Cheng et al (2018)<sup>48</sup>. We then used  
167 the single tube long fragment read (stLFR) technology<sup>49</sup> to preparing the co-  
168 barcoding DNA libraries with the MGIEasy stLFR Library Prep Kit (lot number:  
169 1000005622), and the libraries were then loaded on the sequencer for sequencing  
170 according to the protocol of MGISEQ-2000<sup>50</sup>. To testify the accuracy of genome  
171 assembly, we constructed a DNA library with a 5kb insert size and sequenced by  
172 BGISEQ-500 sequencer. To finally ligate the scaffolds to chromosomes, Hi-C  
173 technology<sup>51</sup> was used to capture the conformation of chromosomes using  
174 another two adult individuals. The primary genome was assembled using the  
175 supernova (v2.1.1)<sup>52</sup> software with the parameters `--maxreads=700M`. We filled  
176 gaps by use of GapCloser<sup>53</sup> and GapCloser stLFR (unpublished method) with the  
177 default parameters. Finally, we performed the chromosome concatenation using  
178 the Hi-C generated data by 3d-DNA pipeline<sup>54</sup>.

## 179 2.3 Comparative genomics analysis

180 Identification of orthology and paralogy groups of *Spodoptera frugiperda* genes  
181 and other considered genomes were done using OrthoMCL<sup>55</sup> methods on the all-

182 versus-all BLASTP alignment (e-value, <math>1e^{-5}</math>). We constructed gene families for  
183 nine species including *Bombyx mori*, *Danaus plexippus*, *Drosophila melanogaster*,  
184 *Heliconius melpomene*, *Helicoverpa armigera*, *Manduca sexta*, *Plutella xylostella*,  
185 *Spodoptera litura* and *Spodoptera frugiperda*. The phylogenetic tree, including these  
186 nine species, was constructed using the combined set of all the single copy genes.

187 To search for homology, we compared protein-coding genes of *Spodoptera*  
188 *frugiperda* to that of other species using BLASTP with an E-value threshold of  $1e^{-5}$ .  
189 Base on the Whole-genome BLASTP and the genome annotation results, we  
190 detected the syntenic blocks using MCscan<sup>56</sup>. A region with at least five syntenic  
191 genes and no more than 15 gapped genes was defined as a syntenic block.

#### 192 2.4 RNA isolation, transcriptome libraries preparation and sequencing

193 The RNA extraction kit (RNeasy Mini Kit, Qiagen) was used for the total RNA  
194 isolation. We performed the RNase-free agarose gel to check the contamination,  
195 and then the RNA integrity and purity were measured by Agilent 2100  
196 Bioanalyzer system (Agilent, United States) and NanoDrop Spectrophotometer  
197 (THERMO, United States), respectively. The extracted RNA was fragmented into  
198 200-400 bp and reverse transcribed to cDNA for library preparation. The libraries  
199 were prepared to follow the manufacturer's instructions for the BGISEQ-500  
200 sequencing platform. Pair-end 100 sequencing was performed on the BGISEQ-  
201 500 sequencer using the processed libraries.

#### 202 2.4 Bioinformatics analysis for transcriptome data

203 Raw data were firstly processed using the Trimmomatic to filter the reads with  
204 adaptors and reads with the proportion of Ns and low-quality bases larger than  
205 10% by SOAPfilter. Bridger software (v20141201) was used to *de novo* assemble  
206 the transcriptome, the redundancies were then removed by TGICL. The contigs  
207 were concatenated into scaffolds and further assembled to unigenes by clustering  
208 and removing redundancy.

209 FPKM was calculated to estimate the expression level of unigenes. In the study,  
210 the reads were mapped against the unigene library using Bowtie, and then  
211 unique mapped reads were selected for estimating the expression level by  
212 combining eXpress. Finally, DEG unigenes were selected with differential  
213 expression level with the parameter of  $FDR \leq 0.01$  and Fold Change  $\geq 4$ .

#### 214 2.5 Identifying the strains and the possible source of FAW invasion in China

215 We used the *Tpi* gene as a DNA maker to identify the strain of the FAW invaded  
216 into China. We identified the *Tpi* gene fragments from four FAWs, including two  
217 from Yunnan province (sequences were retrieved from the whole genome





|                      |                   |             |     |             |       |             |     |             |       |
|----------------------|-------------------|-------------|-----|-------------|-------|-------------|-----|-------------|-------|
|                      | N50               | 507,121     | 226 | 91,970      | 1,220 | 528,269     | 231 | 83,007      | 1,299 |
| stLFR                | Total length (bp) | 542,424,128 |     | 505,703,627 |       | 530,766,122 |     | 496,217,290 |       |
|                      | Ratio of Ns (%)   | 6.77        |     |             |       | 6.51        |     |             |       |
|                      | GC content (%)    | 36.52       |     |             |       | 36.57       |     |             |       |
|                      | N50               | 14,162,803  | 16  | 91,970      | 1,220 | 14,883,732  | 13  | 124,992     | 813   |
| HiC                  | Total length (bp) | 543,659,128 |     | 505,703,627 |       | 531,931,622 |     | 496,217,290 |       |
|                      | Ratio of Ns (%)   | 6.98        |     |             |       | 6.71        |     |             |       |
|                      | GC content (%)    | 36.52       |     |             |       | 36.58       |     |             |       |
| Chromosome Level     |                   | 461,198,141 | 31  |             |       | 435,876,255 | 31  |             |       |
| Chromosome Level (%) |                   | 84.83       |     |             |       | 81.94       |     |             |       |

253

### 254 3.2 Evaluation of the assembly

255 The GC content for the genomes of the male and female individual was found to  
 256 be 35.52% and 36.57% (Table 2), respectively, which showed a similar level with  
 257 most closely related Lepidoptera species ranging from 31.6% to 37.7%<sup>61</sup>. We used  
 258 the Benchmarking Universal Single-Copy Orthologs (BUSCO: version 2.0)<sup>62</sup> and  
 259 Core Eukaryotic Genes (CEGMA)<sup>63</sup> to evaluated the completeness of the two  
 260 assemblies. In BUSCO analysis, genomes of the male and female samples  
 261 covered 95% and 94.5% complete BUSCO genes (Table S3). In the CEGMA  
 262 analysis, 83.47% and 85.48% complete core eukaryotic genes were found for the  
 263 two genomes (Table S4). This is better than all FAW genomes that has been  
 264 published (PRJNA380964; PRJNA257248; PRJEB13110; and PRJNA344686).  
 265 Besides, we also mapped the sequencing data generated from libraries of Hi-C,  
 266 MatePair5K, WGS, and the RNA-seq to the assembled male genome. The  
 267 mapping rates were all higher than 90% (Table 3), and the insert size were also  
 268 consistent with the libraries, except for the MatePair5K, probably because the  
 269 large insert size cannot ensure that the one pair reads they mapped to the same  
 270 scaffold. EST sequences of the FAW were downloaded from NCBI and the  
 271 transcripts were assembled without reference. We mapped these EST sequences  
 272 and transcripts to the male reference genome we assembled, and the results  
 273 showed that more than 90% EST sequences and more than 80% transcripts we  
 274 assembled could be found on the assembled male genome (Table S5). However,  
 275 it is noteworthy that the transcript from SFgdRNA 2 has a lower mapping rate  
 276 than that of SFgdRNA 1. We inferred that this resulted due to the genetic  
 277 differences between the C strain and the R strain, because the SFgdRNA 2  
 278 sample was identified belong to the R strain. Overall, all the above results well  
 279 testified the completeness of the two genomes.

**Table 3 Mapping reads against the assembled male genome using raw reads generated by different libraries**

| Type                   | HIC    | MatePair | stLFR  | RNA-seq | WGS    |
|------------------------|--------|----------|--------|---------|--------|
| Total Mapped Reads     | 93.58% | 93.68%   | 95.60% | 98.98%  | 90.71% |
| Perfect Match          | 38.81% | 38.54%   | 43.67% | 52.14%  | 27.76% |
| Unique Match           | 76.39% | 77.15%   | 83.23% | 76.99%  | 74.77% |
| Total Unmapped Reads   | 6.42%  | 6.32%    | 4.40%  | 1.02%   | 9.29%  |
| Total FullMapped Reads | 32.48% | 30.06%   | 71.45% | 52.46%  | 49.40% |

### 280 3.3 Annotation

281 We firstly used Repeat Modeler (v1.0.11), LTR finder (v1.0.5) and repeatscount  
282 (v1.0.5) methods to identify *de novo* repeat motifs by modeling *ab initio*, and these  
283 repeat motifs were added into the RepBase<sup>64</sup> library as known repeat elements.  
284 We then performed the RepeatMasker<sup>65</sup> to mask the assembly, using the  
285 combined RepBase library. Usually, Repeat elements take a substantial part of  
286 the genome and contribute as important events to genome evolution<sup>61,66,67</sup>. In this  
287 study, by the combination of *de novo* and homology-based searching, 153 Mbp  
288 repeat elements were finally identified for the male FAW, and accounting for  
289 28.24% the FAW genomes.

290 Gene prediction was carried out by both the homology-based and *de novo*  
291 methods using repeat masked genomes. For the *de novo* prediction, we used  
292 Augustus, glimmerHMM and SNAP (Table S6). For the homology-based  
293 approaches, *Bombyx mori*, *Danaus plexippus*, *Drosophila melanogaster* and  
294 *Spodoptera litura* genomes were used for homology alignments using the TblastN.  
295 Moreover, transcripts that were predicted with RNA-seq, Gene sets were then  
296 merged to form a non-redundant gene set with GLEAN; then all annotated genes  
297 were checked and filtered manually. A total of 22201 genes were finally obtained  
298 for the male samples (Table S6).

299 In the final gene set we identified, we found 94.2% compete for BUSCO genes  
300 and 95.16% CEGMA genes, which were all better than the published FAW  
301 genome (Table S7, Table S8). Of these identified genes, 93.48% was confirmed  
302 that have functions (Table S9), which was facilitated the further exploration of  
303 the functions. Besides, we also found 60 miRNAs, 840 tRNAs and 197 rRNAs by  
304 using the homology prediction method.

### 305 3.4 The transcriptome analysis of the larvae

306 After filtering, we finally obtained 58Gb clean data with 341,526,489 cleaned  
307 reads. These reads were assembled into 72,604 contigs with the N50 of 2077bp.  
308 These contigs were further assembled into scaffolds, and the scaffolds were

309 further assembled to 51,495 unigenes by clustering and removing redundancy.  
310 The contig number in our study are significantly higher than that in the study of  
311 Kakumani *et al*<sup>68</sup>. This maybe result from that we only used a single method for  
312 assembly. We also calculated the expression abundance for unigenes between the  
313 fifth-instar and sixth-instar larvae. The result showed 2,648 differentially  
314 expressed genes (DEGs). We further performed the clustering analysis to cluster  
315 genes with identical or similar expressed behaviors. Remarkable expression  
316 difference was found between the fifth-instar larvae and the sixth-instar larvae  
317 (Figure S1). This difference was in consistent with the different strains of the two  
318 larvae (we described in 3.6). However, if the different instar contributes to the  
319 differential expression, it was further confirmed by more detailed analysis.

### 320 3.5 Comparison to other published lepidopteran genomes

321 To further explore the detailed relationship between the FAW and its other  
322 lepidopteran relatives. We constructed a phylogenetic tree of nine genomes using  
323 2,001 single copy genes downloaded from NCBI and insectbase (Table S10). The  
324 result showed that the *S. frugiperda* which we sequenced actually clustered with  
325 its most related species *S. litura*, which is in accordance with the study by Cheng  
326 *et al*<sup>69</sup>(Figure 3).

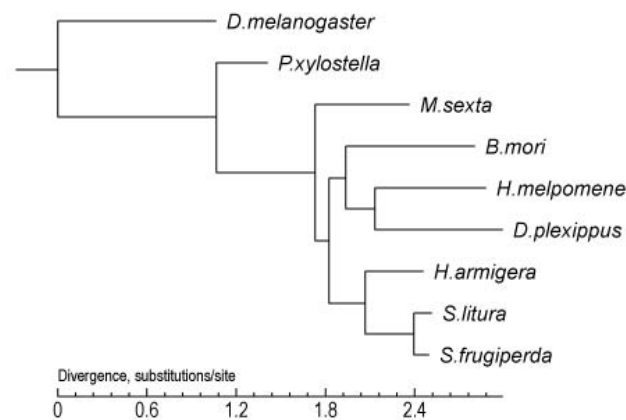

327

328 Figure 3 The phylogenetic relationships among nine lepidopteran genomes.

329 Through the gene family analysis, a total of 12,516 gene families were found in  
330 the *S. frugiperda* genome, including 20,012 genes. Of these gene families, 324 are  
331 specific to the *S. frugiperda* compared to the other seven species (Table S11). Then,  
332 we analyzed the 34 functional gene families of insects, finding some expanded  
333 gene families, including cytochrome p450, glutathione s-transferase, and  
334 hydrolase (Table 4). The cytochrome p450 gene family is closely related with  
335 intensified detoxification<sup>69</sup>, the genes in this family of the *S. frugiperda* is 200,  
336 more than that of *S. litura*, which indicated that the *S. frugiperda* was more  
337 polyphagous than *S. litura*. This is also consistent with the habits of *S. frugiperda*.

338 The expanded glutathione s-transferase gene family was proved that could  
 339 enhance the insecticides tolerance of the *S. litura*<sup>69</sup>. In this study, we found more  
 340 genes for *S. frugiperda*, which indicated that the *S. frugiperda* was probably easier  
 341 to gain resistance to pesticides. These gene families are a valuable genetic source  
 342 to develop more effective pesticides or other methods to manage the FAW.

**Table 4 Identified genes in gene families of 9 insects**

|                                  | DME | PXY | MSE | BMO | HME | DPL | HAR | SLI | SFR |
|----------------------------------|-----|-----|-----|-----|-----|-----|-----|-----|-----|
| ABC transporter                  | 55  | 76  | 40  | 40  | 35  | 38  | 36  | 86  | 66  |
| acetylcholine receptor           | 18  | 27  | 20  | 27  | 24  | 28  | 22  | 22  | 27  |
| Acetylcholinesterase             | 27  | 39  | 62  | 51  | 32  | 27  | 82  | 87  | 46  |
| alkaline phosphatase             | 13  | 10  | 11  | 10  | 8   | 8   | 8   | 11  | 12  |
| aminopeptidase                   | 45  | 53  | 49  | 37  | 35  | 39  | 15  | 19  | 24  |
| carboxylesterase                 | 30  | 55  | 90  | 70  | 50  | 54  | 100 | 110 | 84  |
| Chitinase                        | 45  | 27  | 28  | 24  | 26  | 32  | 23  | 26  | 46  |
| chloride channel                 | 16  | 25  | 20  | 23  | 18  | 19  | 19  | 16  | 24  |
| CTL                              | 2   | 4   | 3   | 2   | 2   | 2   | 3   | 4   | 4   |
| cytochrome p450                  | 104 | 108 | 144 | 96  | 130 | 99  | 121 | 132 | 200 |
| DNA methyltransferase            | 1   | 1   | 1   | 1   | 1   | 1   | 1   | 1   | 1   |
| ecdysone receptor                | 1   | 1   | 3   | 3   | 3   | 2   | 3   | 1   | 3   |
| GABA                             | 15  | 16  | 32  | 9   | 12  | 15  | 16  | 14  | 10  |
| glutamate-gated chloride channel | 10  | 14  | 12  | 13  | 10  | 10  | 12  | 12  | 14  |
| Glutathione s-transferase        | 50  | 28  | 42  | 25  | 23  | 25  | 46  | 47  | 60  |
| glycosyltransferase              | 65  | 25  | 23  | 19  | 24  | 22  | 19  | 21  | 31  |
| G protein                        | 23  | 42  | 36  | 31  | 26  | 29  | 29  | 29  | 30  |
| gustatory receptor               | 54  | 69  | 45  | 76  | 73  | 68  | 197 | 238 | 220 |
| heat shock protein               | 45  | 38  | 54  | 35  | 29  | 46  | 40  | 48  | 45  |
| hydrolase                        | 213 | 250 | 243 | 209 | 181 | 204 | 267 | 310 | 396 |
| immunoglobulin                   | 65  | 51  | 70  | 76  | 56  | 69  | 71  | 67  | 80  |
| odorant-binding protein          | 62  | 65  | 70  | 51  | 87  | 63  | 77  | 61  | 70  |
| odorant receptor                 | 67  | 82  | 79  | 43  | 73  | 64  | 87  | 75  | 75  |
| Painless                         | 1   | 1   | 1   | 1   | 1   | 1   | 1   | 1   | 1   |
| pheromone                        | 43  | 22  | 29  | 15  | 19  | 14  | 16  | 14  | 19  |
| protease inhibitor               | 75  | 33  | 60  | 38  | 26  | 36  | 46  | 39  | 51  |
| Ryanodine receptor               | 6   | 12  | 3   | 7   | 4   | 8   | 6   | 3   | 6   |
| sensory neuron membrane protein  | 3   | 5   | 4   | 5   | 4   | 7   | 7   | 3   | 10  |
| serpin                           | 35  | 23  | 30  | 18  | 19  | 24  | 21  | 18  | 26  |
| sirtuin                          | 6   | 4   | 3   | 5   | 5   | 5   | 7   | 7   | 7   |
| sodium channel                   | 38  | 30  | 33  | 24  | 15  | 27  | 30  | 25  | 36  |
| sugar transporter                | 17  | 51  | 42  | 36  | 40  | 37  | 41  | 40  | 59  |
| superoxide dismutase             | 17  | 18  | 12  | 12  | 9   | 11  | 12  | 13  | 36  |

Vitellogenin receptor

8 14 15 11 9 12 16 14 15

Note: gene families come from <http://www.insect-genome.com/genefamily/gene-family.php>

343

344 3.6 FAW in China includes both the C and R strain, possibly invaded from Africa

345 There are three strain-specific sites (E4165, E4168 and E4183) in the fourth exon of  
 346 the *Tpi* gene that can identify the C strain from the R strain for Western  
 347 Hemisphere populations<sup>57</sup>. Especially, the E4183 is an effective diagnostic marker  
 348 for *Tpi* gene to define the C or R strain. In this study, two Yunnan samples and  
 349 one Guangdong sample were identified as the C strain and the other one  
 350 Guangdong sample was identified as the R strain (Figure 4). The phylogenetic  
 351 tree showed that the two Yunnan samples were clustered in the clade that  
 352 consisted of all C strain individuals, which strengthened the results inferred  
 353 using the strain-specific sites in the fourth exon (Figure 5). This result at least  
 354 showed that the FAW invaded into China included both the strains. However,  
 355 the detailed population genetic structure and the frequencies of the two strains in  
 356 the Chinese population need more information from the population-level  
 357 studies.

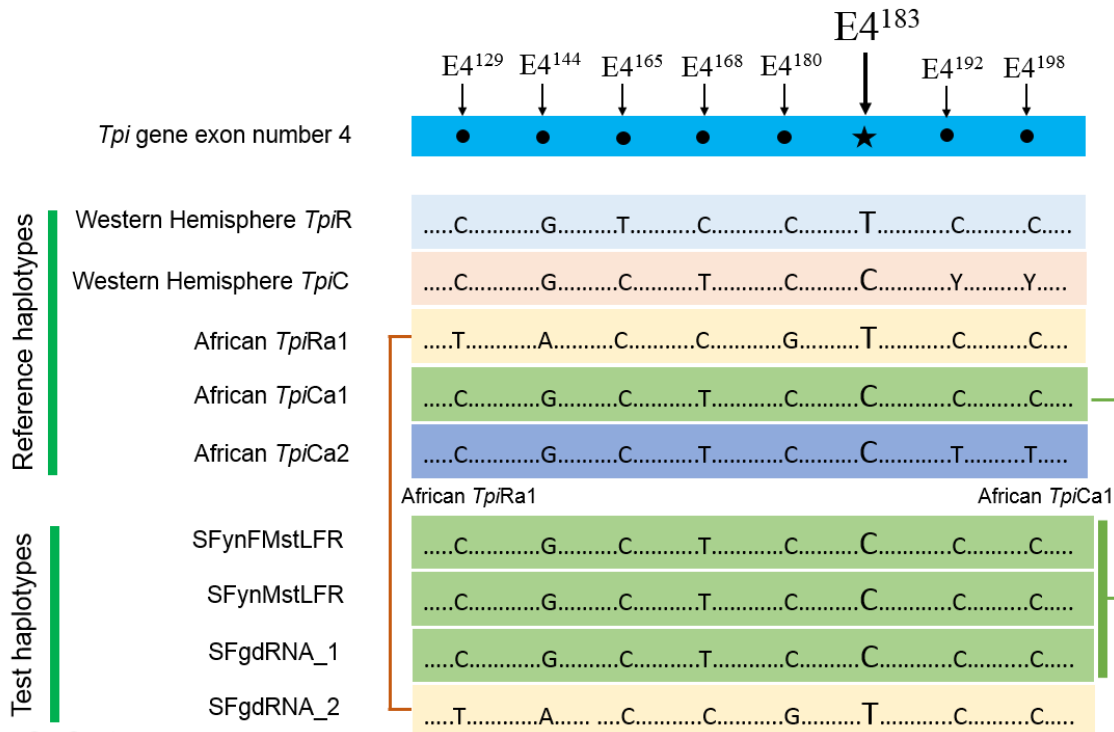

358

359

Figure 4 The identification of C and R strains.

360 To further confirm the possible source of the Chinese FAW, we compared the  
 361 haplotype consisted of all eight polymorphisms in the fourth exon of the *Tpi* gene



362 as shown in the Figure 4. We found that all the four individuals hold identical  
363 haplotype with the African population, including three *TpiCa1* and one *TpiRa1*.  
364 Although the haplotype of C strain was shared by the African and the Western  
365 Hemisphere populations<sup>57</sup>, the *TpiRa1* has not been detected in any Western  
366 Hemisphere populations<sup>57</sup> showing the uniqueness to African populations. The  
367 finding of the *TpiRa1* haplotype in the Guangdong population indicated that  
368 there were at least parts of the FAW populations in China that was invaded from  
369 Africa, probably through the frequent commercial trade and passenger  
370 transportation between Africa and China<sup>5</sup>. However, we cannot confirm other  
371 sources because of the small sample size we used here. The strain information  
372 and possible invasion source found in this study will be extremely important for  
373 making effective strategies to manage the FAWs in China.

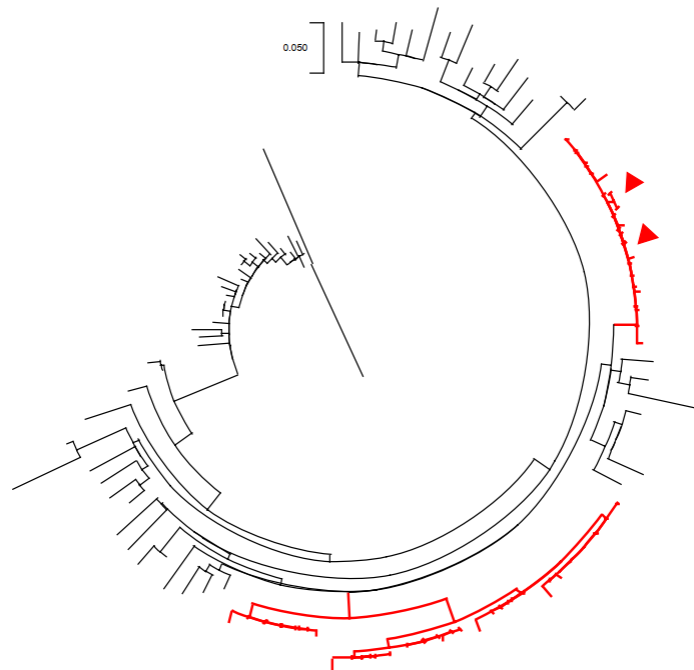

374  
375 Figure 5 The phylogenetic tree to identify the FAW strains of collected from Yunnan, China. The  
376 red branched presented the C strain, the red triangles present the two Yunnan samples.

#### 377 4 Conclusions

378 In summary, we assembled two chromosome scale genomes of the fall  
379 armyworm, representing one male and one female individual procured from  
380 Yunnan province of China. The genome sizes were identified as 542.42 Mb with  
381 N50 of 14.16 Mb, and 530.77 Mb with N50 of 14.89 Mb for the male and female  
382 FAW, respectively. . The completeness of the two genomes are better than all  
383 previously published FAW genomes which is evident by the BUSCO and  
384 CEGMA analysis. A total of 22,201 genes were predicted in the male genome,

385 and 12,516 gene families were found in the *S. frugiperda* genome, including 20,012  
386 genes. Of these gene families, we found expansion of cytochrome p450 and  
387 glutathione s-transferase gene families, which were closely related to the function  
388 of intensified detoxification and pesticides tolerance. We finally identified both  
389 the R strain and C strain individuals in the Chinese population, showed that the  
390 Chinese FAW was most likely invaded from Africa. The strain information and  
391 possible invasion source found in this study will be extremely important for  
392 making the effective strategies to manage the FAWs in China.

### 393 **Acknowledgements**

394 This study was supported by the Guangdong Provincial Key Laboratory of core  
395 collection of corp genetic resources research and application  
396 (NO.2011A091000047), Guangdong Provincial Key Laboratory of Genome Read  
397 and Write (grant no. 2017B030301011) and Key Laboratory of Genomics ,Ministry  
398 of Agriculture.

### 399 **Data availability**

400 The Raw sequencing data and the two chromosome level genome assemblies  
401 have been deposited to the CNSA (CNGB Nucleotide Sequence Archive) with  
402 accession CNP0000513 (<https://db.cngb.org/cnsa/>).

### 403 **Author Contributions**

404 Huanming Yang, Le Kang, Jun Sheng, Youyong Zhu, Yang Dong, Xin Liu and  
405 Huan Liu designed the research. Dongming Fang, Tianming Lan and Yue Chang,  
406 Hongli Wang, Fangneng Huang, Wei Dong and Guangyi Fan performed the data  
407 analysis. Xiaofang Chen, Haorong Lu, Ping Liu, Tongxian Liu, Rushi Hao, Bin  
408 Chen, Shusheng Zhu, Zhihui Lu and Haimeng Li performed the DNA and RNA  
409 extraction and the library preparation. Huan Liu, Tianming Lan, Yang Dong, Wei  
410 Guo, Shuqi He, Le Chen and Lihua Lyu collected the samples. Tianming Lan,  
411 Dongming Fang, Hongli Wang, Sunil Kumar Sahu and Furong Gui wrote and  
412 revised the manuscript. All the authors read and revised the final version of the  
413 manuscript.

### 414 **Competing interests**

415 The authors declare no competing interests.

416

- 417 1 Hinds, W. E. & Dew, J. A. The grass worm or fall army worm. *Alabama*  
418 *Agricultural and Experiment Station Bulletin* **186**, 25 (1915).  
419 2 Pair, S. D., Raulston, J. R., Westbrook, J. K., Wolf, W. W. & Adams, S. D. Fall  
420 Armyworm (Lepidoptera Noctuidae) Outbreak Originating in the Lower Rio  
421 Grande Valley, 1989. *Florida Entomologist* **74**, 14 (1991).

- 422 3 Nagoshi, R. N., Meagher, R. L. & Hay-Roe, M. Inferring the annual migration  
423 patterns of fall armyworm (Lepidoptera: Noctuidae) in the United States from  
424 mitochondrial haplotypes. *Ecology and evolution* **2**, 1458-1467, doi:10.1002/ece3.268  
425 (2012).
- 426 4 Mitchell, E. R. *et al.* Seasonal Periodicity of Fall Armyworm, (Lepidoptera  
427 Noctuidae) in the Caribbean Basin and Northward to Canada. *Journal of*  
428 *entomological science* **26**, 12 (1991).
- 429 5 Early, R., González-Moreno, P., Murphy, S. T. & Day, R. Forecasting the global  
430 extent of invasion of the cereal pest *Spodoptera frugiperda*, the fall armyworm.  
431 *NeoBiota* **40**, 25-50, doi:10.3897/neobiota.40.28165 (2018).
- 432 6 Johnson, S. J. Migration and the life history strategy of the fall armyworm,  
433 *Spodoptera frugiperda* in the Western Hemisphere. *Insect Sci. Appli* **8**, 7 (1987).
- 434 7 du Plessis, H., van den Berg, J., Ota, N. & Kriticos, D. J. *Spodoptera frugiperda*  
435 (Fall Armyworm). *CSIRO-InSTePP Pest Geography* (2018).
- 436 8 Westbrook, J. K., Nagoshi, R. N., Meagher, R. L., Fleischer, S. J. & Jairam, S.  
437 Modeling seasonal migration of fall armyworm moths. *International journal of*  
438 *biometeorology* **60**, 255-267, doi:10.1007/s00484-015-1022-x (2016).
- 439 9 Goergen, G., Kumar, P. L., Sankung, S. B., Togola, A. & Tamo, M. First Report of  
440 Outbreaks of the Fall Armyworm *Spodoptera frugiperda* (J E Smith)  
441 (Lepidoptera, Noctuidae), a New Alien Invasive Pest in West and Central Africa.  
442 *PloS one* **11**, e0165632, doi:10.1371/journal.pone.0165632 (2016).
- 443 10 FAO. Briefing Note on FAO Actions on Fall Armyworm in Africa  
444 <http://www.fao.org/3/a-bt415e.pdf> (2017).
- 445 11 Cock, M. J. W., Beseh, P. K., Buddie, A. G., Cafa, G. & Crozier, J. Molecular  
446 methods to detect *Spodoptera frugiperda* in Ghana, and implications for  
447 monitoring the spread of invasive species in developing countries. *Scientific*  
448 *reports* **7**, 4103, doi:10.1038/s41598-017-04238-y (2017).
- 449 12 Sharanabasappa *et al.* First report of fall armyworm, *Spodoptera frugiperda* (J E  
450 smith) (Lepidoptera: Noctuidae), an alien invasive pest on maize in India. *Pest*  
451 *Management in Horticultural Ecosystems* **24**, 7 (2018).
- 452 13 Ganiger, P. C. *et al.* Occurrence of the new invasive pest, fall armyworm,  
453 *Spodoptera frugiperda* (J.E. Smith) (Lepidoptera: Noctuidae), in the maize fields  
454 of Karnataka, India. *Current Science* **115**, 3 (2018).
- 455 14 Portal, C. F. A. Available online: <https://www.cabi.org/isc/fallarmyworm>  
456 (accessed on 6 June 2019).
- 457 15 CABI. Invasive Species Compendium. <https://www.cabi.org/isc/fallarmyworm>.
- 458 16 Casmuz, A. *et al.* Revisión de los hospederos del gusano cogollero del maíz,  
459 *Spodoptera frugiperda* (Lepidoptera: Noctuidae). *Revista de la Sociedad*  
460 *Entomológica Argentina* **69**, 23 (2010).
- 461 17 Murúa, G., Molina-Ochoa, J. & Coviella, C. Population dynamics of the fall  
462 armyworm, *Spodoptera frugiperda* (Lepidoptera: Noctuidae) and its parasitoids  
463 in northwestern Argentina. *Florida Entomologist* **89**, 8 (2006).

- 464 18 Silva-Aguayo, G. *et al.* Bioactivity of Boldo (*Peumus boldus* Molina) (Laurales:  
465 Monimiaceae) on *Spodoptera frugiperda* (J.E. Smith) and *Helicoverpa zea* (Boddie)  
466 (Lepidoptera: Noctuidae). *Southwestern Entomologist* **35**, 215-231,  
467 doi:10.3958/059.035.0301 (2010).
- 468 19 Wyckhuys, K. A. G. & O'Neil, R. J. Population dynamics of *Spodoptera*  
469 *frugiperda* Smith (Lepidoptera: Noctuidae) and associated arthropod natural  
470 enemies in Honduran subsistence maize. *Crop Protection* **25**, 1180-1190,  
471 doi:10.1016/j.cropro.2006.03.003 (2006).
- 472 20 Day, R. *et al.* Fall Armyworm: Impacts and Implications for Africa. *Outlooks on*  
473 *Pest Management* **28**, 196-201, doi:10.1564/v28\_oct\_02 (2017).
- 474 21 Sisay, B. *et al.* First report of the fall armyworm, *Spodoptera frugiperda*  
475 (Lepidoptera: Noctuidae), natural enemies from Africa. *Journal of Applied*  
476 *Entomology* **142**, 800-804, doi:10.1111/jen.12534 (2018).
- 477 22 Gordy, J. W., Leonard, B. R., Blouin, D., Davis, J. A. & Stout, M. J. Comparative  
478 Effectiveness of Potential Elicitors of Plant Resistance against *Spodoptera*  
479 *frugiperda* (J. E. Smith) (Lepidoptera: Noctuidae) in Four Crop Plants. *PloS one*  
480 **10**, e0136689, doi:10.1371/journal.pone.0136689 (2015).
- 481 23 Midega, C. A. O. *et al.* Farmers' perceptions of cotton pests and their  
482 management in western Kenya. *Crop Protection* **42**, 193-201,  
483 doi:10.1016/j.cropro.2012.07.010 (2012).
- 484 24 Dal Pogetto, M. H. F. A. *et al.* Corn Yield with Reduction of Insecticidal Sprayings  
485 Against Fall Armyworm *Spodoptera frugiperda* (Lepidoptera Noctuidae). *Journal*  
486 *of Agronomy* **11**, 5, doi:10.3923/ja.2012.17.21 (2012).
- 487 25 Fotso Kuate, A. *et al.* *Spodoptera frugiperda* Smith (Lepidoptera: Noctuidae) in  
488 Cameroon: Case study on its distribution, damage, pesticide use, genetic  
489 differentiation and host plants. *PloS one* **14**, e0215749,  
490 doi:10.1371/journal.pone.0215749 (2019).
- 491 26 Yu, S. J., Nguyen, S. N. & Abo-Elghar, G. E. Biochemical characteristics of  
492 insecticide resistance in the fall armyworm, *Spodoptera frugiperda* (J.E. Smith).  
493 *Pesticide Biochemistry and Physiology* **77**, 1-11, doi:10.1016/s0048-3575(03)00079-8  
494 (2003).
- 495 27 de Bon, H. *et al.* Pesticide risks from fruit and vegetable pest management by  
496 small farmers in sub-Saharan Africa. A review. *Agronomy for Sustainable*  
497 *Development* **34**, 723-736, doi:10.1007/s13593-014-0216-7 (2014).
- 498 28 Sousa, F. F. *et al.* Life-History Traits of *Spodoptera frugiperda* Populations  
499 Exposed to Low-Dose Bt Maize. *PloS one* **11**, e0156608,  
500 doi:10.1371/journal.pone.0156608 (2016).
- 501 29 Bernardi, D. *et al.* Cross-Resistance between Cry1 Proteins in Fall Armyworm  
502 (*Spodoptera frugiperda*) May Affect the Durability of Current Pyramided Bt  
503 Maize Hybrids in Brazil. *PloS one* **10**, e0140130, doi:10.1371/journal.pone.0140130  
504 (2015).
- 505 30 Aguirre, L. A. *et al.* Evaluation of Foliar Damage by *Spodoptera*  
506 *frugiperda* (Lepidoptera: Noctuidae) to Genetically Modified Corn (Poales:

- 507 Poaceae) in Mexico. *Florida Entomologist* **99**, 276-280, doi:10.1653/024.099.0218  
508 (2016).
- 509 31 Midega, C. A. O., Pittchar, J. O., Pickett, J. A., Hailu, G. W. & Khan, Z. R. A  
510 climate-adapted push-pull system effectively controls fall armyworm,  
511 *Spodoptera frugiperda* (J E Smith), in maize in East Africa. *Crop Protection* **105**,  
512 10-15, doi:10.1016/j.cropro.2017.11.003 (2018).
- 513 32 Kenis, M. *et al.* *Telenomus Remus*, a Candidate Parasitoid for the Biological  
514 Control of *Spodoptera Frugiperda* in Africa, is already Present on the Continent.  
515 *Insects* **10**, doi:10.3390/insects10040092 (2019).
- 516 33 Pashley, D. P. Host-associated Genetic Differentiation in Fall Armyworm  
517 (Lepidoptera: Noctuidae): A Sibling Species Complex? *Annals of the Entomological*  
518 *Society of America* **79**, 7 (1986).
- 519 34 Juárez, M. L. *et al.* Population structure of *Spodoptera frugiperda* maize and rice  
520 host forms in South America: are they host strains? *Entomologia Experimentalis et*  
521 *Applicata* **152**, 182-199, doi:10.1111/eea.12215 (2014).
- 522 35 Nagoshi, R. N. *et al.* Analysis of strain distribution, migratory potential, and  
523 invasion history of fall armyworm populations in northern Sub-Saharan Africa.  
524 *Scientific reports* **8**, 3710, doi:10.1038/s41598-018-21954-1 (2018).
- 525 36 Nagoshi, R. N. & Meagher, R. L. Behavior and distribution of the two fall  
526 armyworm host strains in Florida. *Florida Entomologist* **87**, 10,  
527 doi:[http://dx.doi.org/10.1653/0015-4040\(2004\)087\[0440:BADOTT\]2.0.CO;2](http://dx.doi.org/10.1653/0015-4040(2004)087[0440:BADOTT]2.0.CO;2) (2004).
- 528 37 Meagher, R. L. & Nagoshi, R. N. Differential Feeding of Fall Armyworm  
529 (Lepidoptera: Noctuidae) Host Strains on Meridic and Natural Diets. *Annals of*  
530 *the Entomological Society of America* **105**, 462-470, doi:10.1603/an11158 (2012).
- 531 38 Nagoshi, R. N., Silvie, P. & Meagher, R. L. Comparison of Haplotype Frequencies  
532 Differentiate Fall Armyworm (Lepidoptera Noctuidae) Corn-Strain Populations  
533 from Florida and Brazil. *Molecular Entomology* **100**, 8, doi:10.1603/0022-  
534 0493(2007)100[954:cohfdf]2.0.co;2 (2007).
- 535 39 Nagoshi, R. N. *et al.* Haplotype Profile Comparisons Between *Spodoptera*  
536 *frugiperda* (Lepidoptera: Noctuidae) Populations From Mexico With Those From  
537 Puerto Rico, South America, and the United States and Their Implications to  
538 Migratory Behavior. *Journal of economic entomology* **108**, 135-144,  
539 doi:10.1093/jee/tou044 (2015).
- 540 40 Nagoshi, R. N. *et al.* Using Haplotypes to Monitor the Migration of Fall  
541 Armyworm (Lepidoptera Noctuidae) Corn-Strain Populations from Texas and  
542 Florida. *Journal of economic entomology* **101**, 8, doi:10.1603/0022-  
543 0493(2008)101[742:uhtmtm]2.0.co;2 (2008).
- 544 41 Nagoshi, R. N. *et al.* Fall armyworm migration across the Lesser Antilles and the  
545 potential for genetic exchanges between North and South American populations.  
546 *PloS one* **12**, e0171743, doi:10.1371/journal.pone.0171743 (2017).
- 547 42 Unbehend, M. *et al.* Geographic variation in sexual attraction of *Spodoptera*  
548 *frugiperda* corn- and rice-strain males to pheromone lures. *PloS one* **9**, e89255,  
549 doi:10.1371/journal.pone.0089255 (2014).



- 550 43 Adamczyk Jr, J. J., Holloway, J. W., Leonard, B. R. & Graves, J. B. Susceptibility of  
551 Fall Armyworm Collected from Different Plant Hosts to Selected Insecticides and  
552 Transgenic Bt Cotton. *Journal of Cotton Science* **1**, 8 (1997).
- 553 44 Nagoshi, R. N. Evidence that a major subpopulation of fall armyworm found in  
554 the Western Hemisphere is rare or absent in Africa, which may limit the range of  
555 crops at risk of infestation. *PloS one* **14**, e0208966,  
556 doi:10.1371/journal.pone.0208966 (2019).
- 557 45 Kakumani, P. K., Malhotra, P., Mukherjee, S. K. & Bhatnagar, R. K. A draft  
558 genome assembly of the army worm, *Spodoptera frugiperda*. *Genomics* **104**, 134-  
559 143, doi:10.1016/j.ygeno.2014.06.005 (2014).
- 560 46 Gouin, A. *et al.* Two genomes of highly polyphagous lepidopteran pests  
561 (*Spodoptera frugiperda*, Noctuidae) with different host-plant ranges. *Scientific*  
562 *reports* **7**, 11816, doi:10.1038/s41598-017-10461-4 (2017).
- 563 47 Nandakumar, S., Ma, H. & Khan, A. S. Whole-Genome Sequence of the  
564 *Spodoptera frugiperda* Sf9 Insect Cell Line. *Genome Announcements* **5**:e00829-17,  
565 doi:https://doi.org/10.1128/genomeA.00829-17 (2017).
- 566 48 Cheng, X. *et al.* A simple bead-based method for generating cost-effective co-  
567 barcoded sequence reads. 11 October 2018, *PROTOCOL (Version 1) available at*  
568 *Protocol Exchange* [[+https://doi.org/10.1038/protex.2018.116](https://doi.org/10.1038/protex.2018.116)].
- 569 49 Wang, O. *et al.* Efficient and unique cobarcoding of second-generation  
570 sequencing reads from long DNA molecules enabling cost-effective and accurate  
571 sequencing, haplotyping, and de novo assembly. *Genome research* **29**, 798-808,  
572 doi:10.1101/gr.245126.118 (2019).
- 573 50 Huang, J. *et al.* A reference human genome dataset of the BGISEQ-500 sequencer.  
574 *GigaScience* **6**, 1-9, doi:10.1093/gigascience/gix024 (2017).
- 575 51 Lieberman-Aiden, E. *et al.* Comprehensive mapping of long-range interactions  
576 reveals folding principles of the human genome. *Science* **326**, 289-293,  
577 doi:10.1126/science.1181369 (2009).
- 578 52 Weisenfeld, N. I., Kumar, V., Shah, P., Church, D. M. & Jaffe, D. B. Direct  
579 determination of diploid genome sequences. *Genome research* **27**, 757-767,  
580 doi:10.1101/gr.214874.116 (2017).
- 581 53 Luo, R. *et al.* SOAPdenovo2: an empirically improved memory-efficient short-  
582 read de novo assembler. *GigaScience* **1**, 18, doi:10.1186/2047-217X-1-18 (2012).
- 583 54 Dudchenko, O. *et al.* De novo assembly of the *Aedes aegypti* genome using Hi-C  
584 yields chromosome-length scaffolds. *Science* **356**, 92-95,  
585 doi:10.1126/science.aal3327 (2017).
- 586 55 Li, L., Stoeckert, C. J., Jr. & Roos, D. S. OrthoMCL: identification of ortholog  
587 groups for eukaryotic genomes. *Genome research* **13**, 2178-2189,  
588 doi:10.1101/gr.1224503 (2003).
- 589 56 Wang, Y. *et al.* MCScanX: a toolkit for detection and evolutionary analysis of  
590 gene synteny and collinearity. *Nucleic acids research* **40**, e49,  
591 doi:10.1093/nar/gkr1293 (2012).

- 592 57 Nagoshi, R. N., Goergen, G., Plessis, H. D., van den Berg, J. & Meagher, R., Jr.  
593 Genetic comparisons of fall armyworm populations from 11 countries spanning  
594 sub-Saharan Africa provide insights into strain composition and migratory  
595 behaviors. *Scientific reports* **9**, 8311, doi:10.1038/s41598-019-44744-9 (2019).
- 596 58 Guindon, S. *et al.* New algorithms and methods to estimate maximum-likelihood  
597 phylogenies: assessing the performance of PhyML 3.0. *Systematic biology* **59**, 307-  
598 321, doi:10.1093/sysbio/syq010 (2010).
- 599 59 Chenna, R. *et al.* Multiple sequence alignment with the Clustal series of  
600 programs. *Nucleic acids research* **31**, 3497-3500, doi:10.1093/nar/gkg500 (2003).
- 601 60 Triant, D. A., Cinel, S. D. & Kawahara, A. Y. Lepidoptera genomes: current  
602 knowledge, gaps and future directions. *Current opinion in insect science* **25**, 99-105,  
603 doi:10.1016/j.cois.2017.12.004 (2018).
- 604 61 Nowell, R. W. *et al.* A high-coverage draft genome of the mycalesine butterfly  
605 *Bicyclus anynana*. *GigaScience* **6**, 1-7, doi:10.1093/gigascience/gix035 (2017).
- 606 62 Simao, F. A., Waterhouse, R. M., Ioannidis, P., Kriventseva, E. V. & Zdobnov, E.  
607 M. BUSCO: assessing genome assembly and annotation completeness with  
608 single-copy orthologs. *Bioinformatics* **31**, 3210-3212,  
609 doi:10.1093/bioinformatics/btv351 (2015).
- 610 63 Parra, G., Bradnam, K. & Korf, I. CEGMA: a pipeline to accurately annotate core  
611 genes in eukaryotic genomes. *Bioinformatics* **23**, 1061-1067,  
612 doi:10.1093/bioinformatics/btm071 (2007).
- 613 64 Bao, W., Kojima, K. K. & Kohany, O. Repbase Update, a database of repetitive  
614 elements in eukaryotic genomes. *Mobile DNA* **6**, 11, doi:10.1186/s13100-015-0041-9  
615 (2015).
- 616 65 Saha, S., Bridges, S., Magbanua, Z. V. & Peterson, D. G. Empirical comparison of  
617 ab initio repeat finding programs. *Nucleic acids research* **36**, 2284-2294,  
618 doi:10.1093/nar/gkn064 (2008).
- 619 66 Lorenzi, H. *et al.* Genome wide survey, discovery and evolution of repetitive  
620 elements in three *Entamoeba* species. *BMC genomics* **9**, 595, doi:10.1186/1471-  
621 2164-9-595 (2008).
- 622 67 Thybert, D. *et al.* Repeat associated mechanisms of genome evolution and  
623 function revealed by the *Mus caroli* and *Mus pahari* genomes. *Genome research* **28**,  
624 448-459, doi:10.1101/gr.234096.117 (2018).
- 625 68 Kakumani, P. K. *et al.* De novo transcriptome assembly and analysis of Sf21 cells  
626 using illumina paired end sequencing. *Biology direct* **10**, 44, doi:10.1186/s13062-  
627 015-0072-7 (2015).
- 628 69 Cheng, T. *et al.* Genomic adaptation to polyphagy and insecticides in a major East  
629 Asian noctuid pest. *Nature ecology & evolution* **1**, 1747-1756, doi:10.1038/s41559-  
630 017-0314-4 (2017).
